# Supplementary material
Source: PubMed Central journal article supplement (PMC4167975)
Supplement: NIHMS611871-supplement-supplement_1.pdf [file NIHMS611871-supplement-supplement_1.pdf]

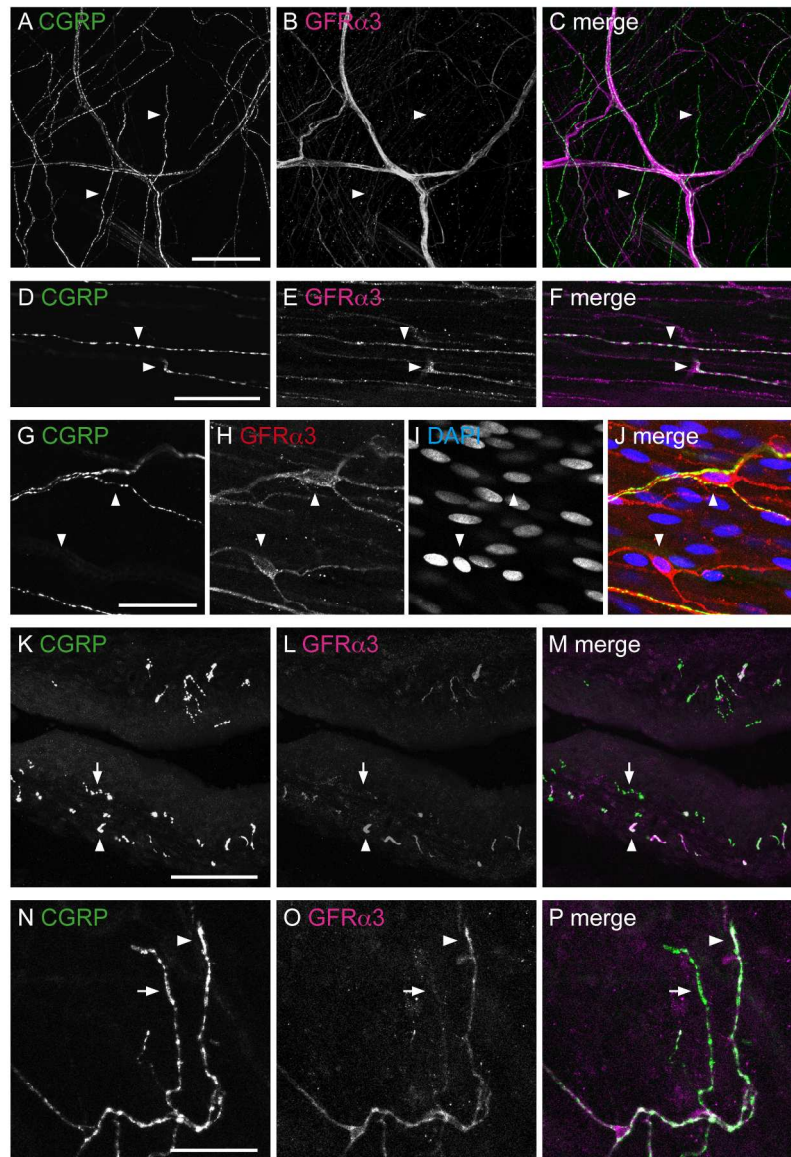

Supplementary figure 3

Supplementary Figure 3. Co-expression of CGRP- and GFR $\alpha$ 3-immunoreactivity (IR) in the detrusor and suburothelial plexus. All panels except K-M (cryosection) are from whole mount preparations. A-C: Confocal z-stack (34  $\mu$ m thick, 1  $\mu$ m step size) through the detrusor showed that many CGRP-IR axon bundles contained GFR $\alpha$ 3-IR axons, but some single axons labeled for CGRP-IR were GFR $\alpha$ 3-negative (arrowheads). D-F: Confocal image in the detrusor illustrating partial co-expression (arrowheads) between CGRP- and GFR $\alpha$ 3-IR in axons. G-J: Confocal image in the detrusor showing two small, elongated GFR $\alpha$ 3-IR cells (arrowheads) with their processes. These appeared to be innervated by CGRP axons. DAPI (blue) labels nuclei of GFR $\alpha$ 3-IR cells and surrounding muscle cells. K-M: Confocal z-stack (15  $\mu$ m thick, 0.5  $\mu$ m step size) of a cryosection showing the majority of GFR $\alpha$ 3-IR axons in the suburothelial plexus were immunoreactive for CGRP but relatively few CGRP-IR axons were immunoreactive for GFR $\alpha$ 3. N-P: Confocal images in the suburothelial plexus of a whole mount demonstrating that most GFR $\alpha$ 3-IR terminals were immunoreactive for CGRP, but some CGRP-IR terminals were not immunoreactive for GFR $\alpha$ 3. In K-P, arrows indicate single-labeled CGRP-IR axons (K-M) and terminals (N-P), whereas arrowheads indicate a double-

labeled GFR $\alpha$ 3- and CGRP-IR axon (k-m), and terminal (n-p). Scale bar = 100  $\mu$ m in (A) also applies to (B, C); 30  $\mu$ m in (D) also applies to (E, F); 20  $\mu$ m in (G) also applies to (H-J). Scale bar = 100  $\mu$ m in (K) also applies to (L-M); 30  $\mu$ m in (N) also applies to (O, P). CGRP, calcitonin gene-related peptide; GFR $\alpha$ 3, glial cell line-derived neurotrophic factor family receptor  $\alpha$ 3.  
171x253mm (300 x 300 DPI)

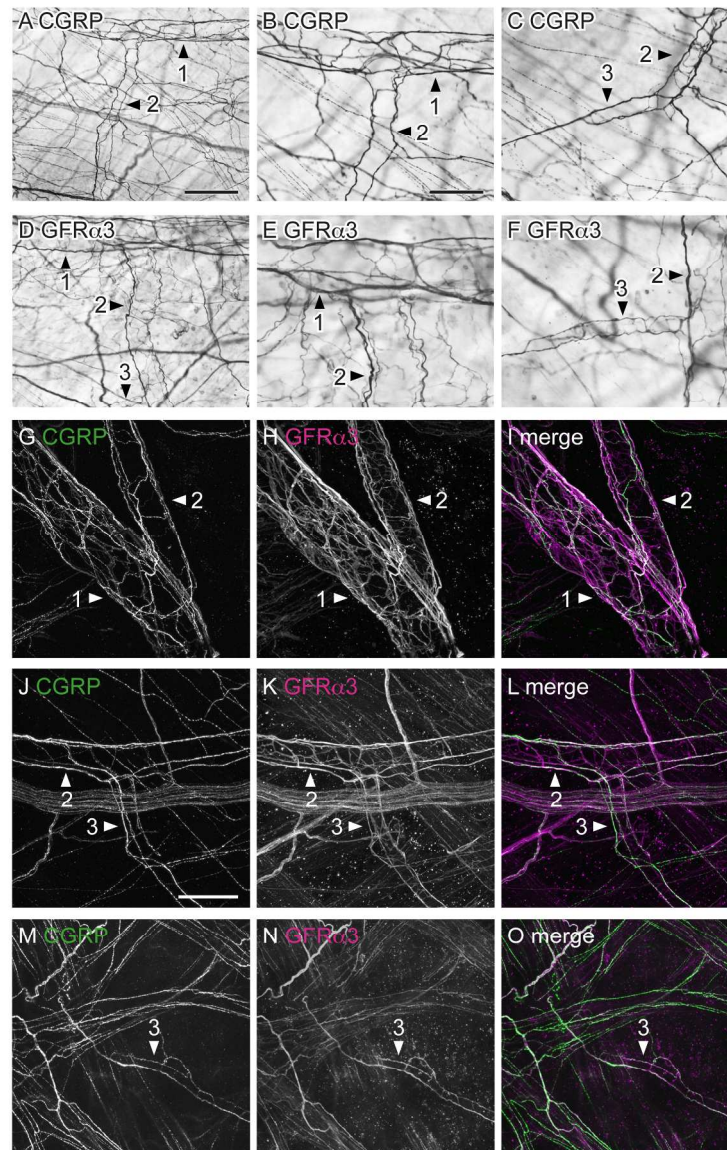

Supplementary figure 5

Supplementary Figure 5. CGRP- and GFR $\alpha$ 3-immunoreactive (IR) axons associated with the bladder vasculature as viewed in whole mounts. Panels A-F show diaminobenzidine (DAB)-processed tissue viewed with conventional microscopy whereas G-O are confocal micrographs of immunofluorescence. Numbered arrowheads indicate primary, secondary and tertiary branches of the vascular tree. A-C: Many CGRP-IR para-vascular axons were found on the primary, secondary (A, B) and tertiary (C) branches of the vascular tree; sparse axons were also found on the primary branch but were sparse on subsequent branches. D-F: Para- and peri-vascular GFR $\alpha$ 3-IR axons were associated with all branches of the vascular tree. G-I: Many para-vascular CGRP- and GFR $\alpha$ 3-IR axons were associated with the primary and secondary branches of the vascular tree; GFR $\alpha$ 3-IR peri-vascular axons were more prevalent than CGRP-IR peri-vascular axons on these branches. J-I: CGRP- and GFR $\alpha$ 3-IR para-vascular axons were associated with secondary and tertiary vessel branches; many GFR $\alpha$ 3-IR peri-vascular axons were present in these branches. m-o: Neither CGRP- nor GFR $\alpha$ 3-IR para-vascular axons extended to the most distal aspects of the vascular tree. Images (G-O) are confocal z-stacks (thickness: G-I, 45  $\mu$ m; J-L, 28  $\mu$ m; M-O, 30  $\mu$ m; all with 1  $\mu$ m step size). Scale

bar = 200  $\mu\text{m}$  in (A) also applies to (D); 100  $\mu\text{m}$  in (B) also applies to (C, E, F); 100  $\mu\text{m}$  in (g) also applies to (H, I); 100  $\mu\text{m}$  (J) also applies (K, L); 100  $\mu\text{m}$  in (M) also applies to (N, O). CGRP, calcitonin gene-related peptide; GFR $\alpha$ 3, glial cell line-derived neurotrophic factor family receptor  $\alpha$ 3.  
164x262mm (300 x 300 DPI)

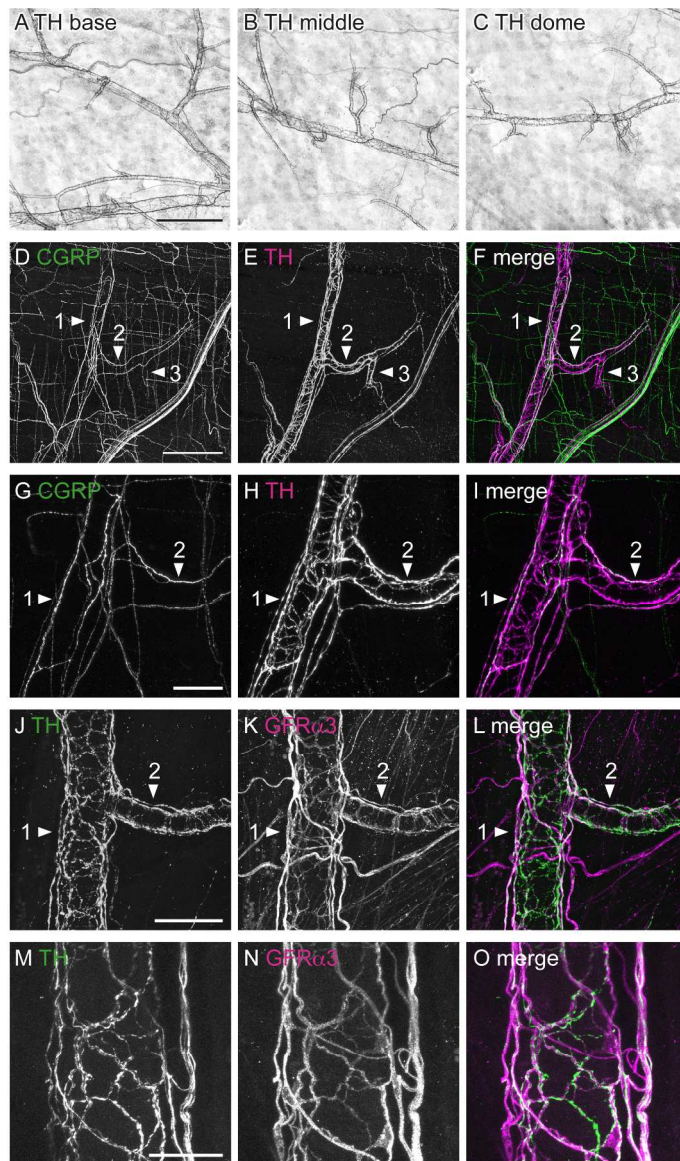

Supplementary figure 6

Supplementary Figure 6. Comparison of different axon populations supplying blood vessels in bladder whole mounts. Panels A-C show diaminobenzidine (DAB)-processed tissue viewed with conventional microscopy whereas D-O are confocal micrographs of immunofluorescence. Numbered arrowheads indicate primary, secondary and tertiary branches of the vascular tree. A-C: TH-immunoreactive (IR) axons densely innervated all branches of the vascular tree that traversed the bladder (A: base; B: middle; C: dome). D-F: Many TH-IR axons and relatively few CGRP-IR axons were associated with distal portions of primary vessel branches. G-I: Higher magnification of the primary to secondary branch point in d-f that demonstrates relatively few CGRP-IR peri-vascular axons. J-L: Numerous TH- and GFR $\alpha$ 3-IR para- and peri-vascular axons densely innervated the primary and secondary branches of the vascular tree. M-O: Many TH-IR para- and peri-vascular axons were immunoreactive for GFR $\alpha$ 3. Panels (D-O) are confocal z-stacks (thickness: D-F, 50  $\mu$ m; g-l, 30-32  $\mu$ m; all with 1  $\mu$ m step size). Scale bar = 500  $\mu$ m in (A) also applies to (B, C); 200  $\mu$ m in (D) also applies to (E, F); 50  $\mu$ m in (G) also applies to (H-L); 40  $\mu$ m in (M) also applies to (N-O). CGRP, calcitonin gene-related peptide; GFR $\alpha$ 3, glial cell line-derived neurotrophic factor family receptor  $\alpha$ 3; TH,

tyrosine hydroxylase.  
156x268mm (300 x 300 DPI)

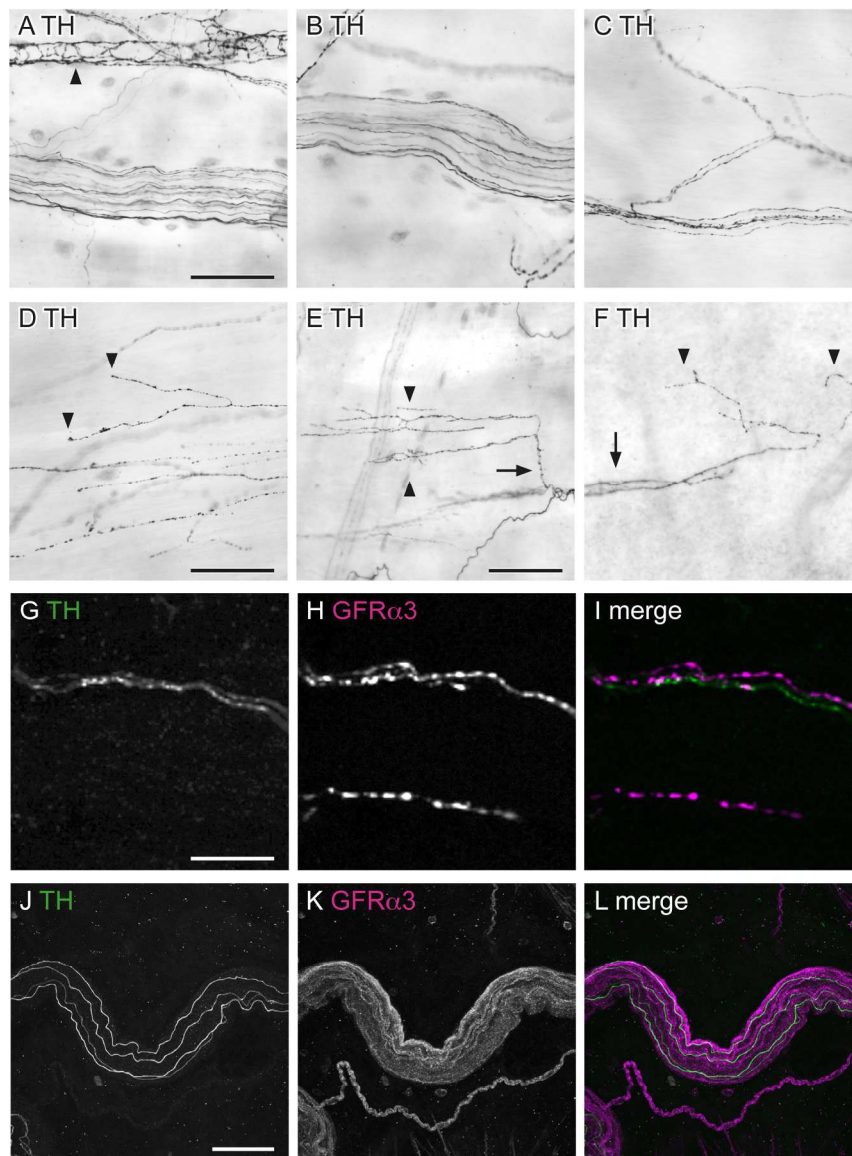

Supplementary figure 7

Supplementary Figure 7. Non-vascular noradrenergic innervation of the detrusor, as viewed in whole mount preparations. Panels A-F show diaminobenzidine (DAB)-processed tissue viewed with conventional microscopy whereas G-L are confocal micrographs of immunofluorescence. A-C: TH-immunoreactive (IR) axon bundles of varying thickness and axons associated with a blood vessel (arrowhead, A). D-F: Three types of TH-IR axon terminals (arrowheads) were found in the detrusor: non-specialised simple endings (D), specialised multi-branched endings (E), and those that branched off the vascular tree, originating from paravascular axons (F). Arrows indicate a branch point from a single specialised TH-IR axon (E) and TH-IR paravascular axons on a distal portion of the vascular tree (F). G-I: TH- and GFR $\alpha$ 3-IR were rarely co-expressed in axons in the detrusor. J-L: Few TH-IR axons travelled within the large diameter bundles of GFR $\alpha$ 3-IR axons; these TH-IR axons did not co-express GFR $\alpha$ 3-IR. Images (G-O) are confocal z-stacks (thickness: G-I, 10  $\mu$ m; J-L, 20  $\mu$ m; all with 1  $\mu$ m step size). Scale bar = 100  $\mu$ m in (A) also applies to (B, C); 100  $\mu$ m in (D) also applies to (E, F); 10  $\mu$ m in (G) also applies to (G, I); 50  $\mu$ m in (J) also applies to (J, K, L). GFR $\alpha$ 3, glial cell line-derived neurotrophic factor family receptor  $\alpha$ 3; TH, tyrosine hydroxylase.

167x228mm (300 x 300 DPI)



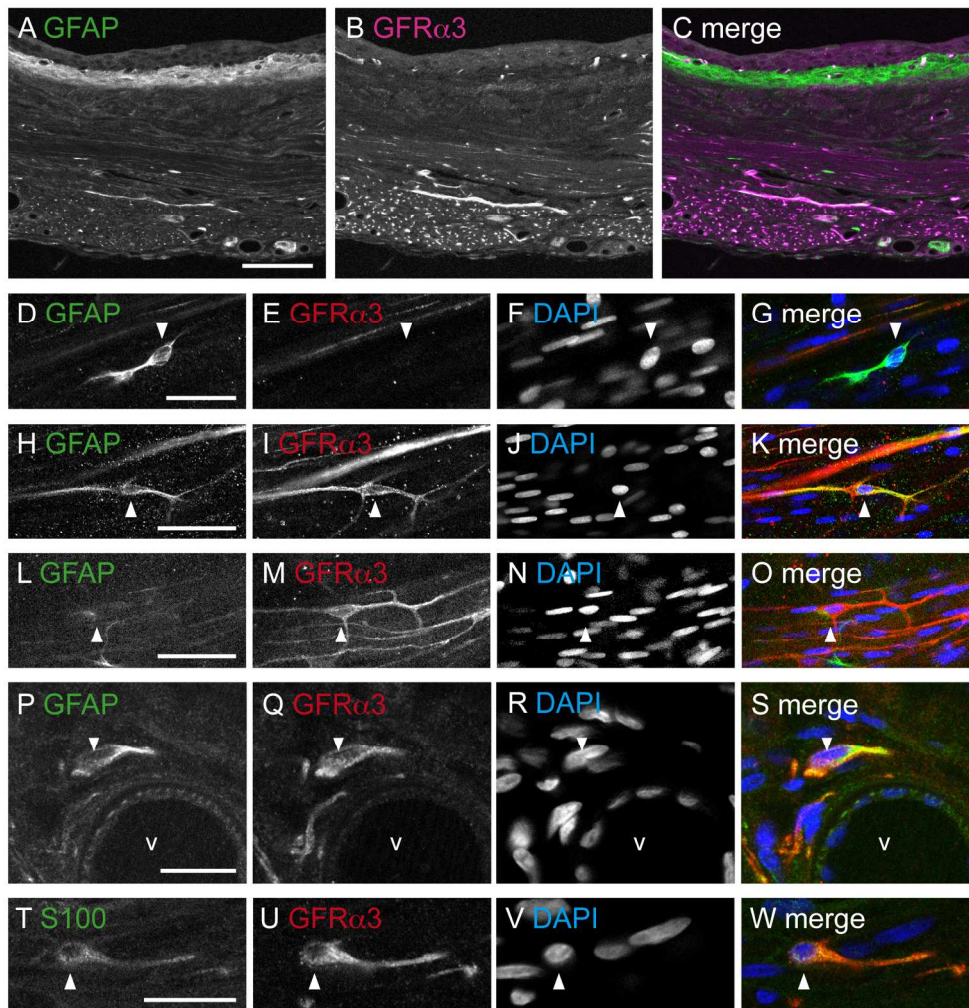

Supplementary figure 9

Supplementary Figure 9. Comparison of glial markers (GFAP- and S100-) with GFR $\alpha$ 3-immunoreactive (IR) distribution in the bladder. Panels show confocal images of immunofluorescence in bladder sections (A-C, P-S) and wholemount preparations (D-O, T-W). DAPI labelling of nuclei was performed to indicate general cellular distribution within each tissue and to show that none of the other markers were found within the nucleus. A-C: Comparison of GFAP- and GFR $\alpha$ 3-IR distribution in the bladder at low magnification. D-G: Many, but not all GFAP-IR cells in the detrusor were immunoreactive for GFR $\alpha$ 3. H-K: Example of a double labeled GFAP- and GFR $\alpha$ 3-IR glial cell in the detrusor. L-O: The majority of GFR $\alpha$ 3-IR cells with elongated processes were not immunoreactive for GFAP. P-S: Many GFR $\alpha$ 3-IR cells associated with the vasculature were immunoreactive for GFAP. T-W: Many S100-IR cells in the detrusor were immunoreactive for GFR $\alpha$ 3. Arrowheads indicate single-labeled GFAP-IR cell (D-G), single-labeled GFR $\alpha$ 3-IR cell (L-O), and double-labeled cells (H-K, P-S, T-W). The lumen of the blood vessel in panels P-S is indicated (V). Scale bar = 200  $\mu$ m in (A) also applies (B, C); 20  $\mu$ m in (D, H, L, T) also applies to (E-G, I-K, M-O, U-W); 10  $\mu$ m in (P) also applies to (Q-S). GFAP, glial fibrillary acidic protein; GFR $\alpha$ 3, glial cell line-derived neurotrophic factor family receptor  $\alpha$ 3.

173x182mm (300 x 300 DPI)

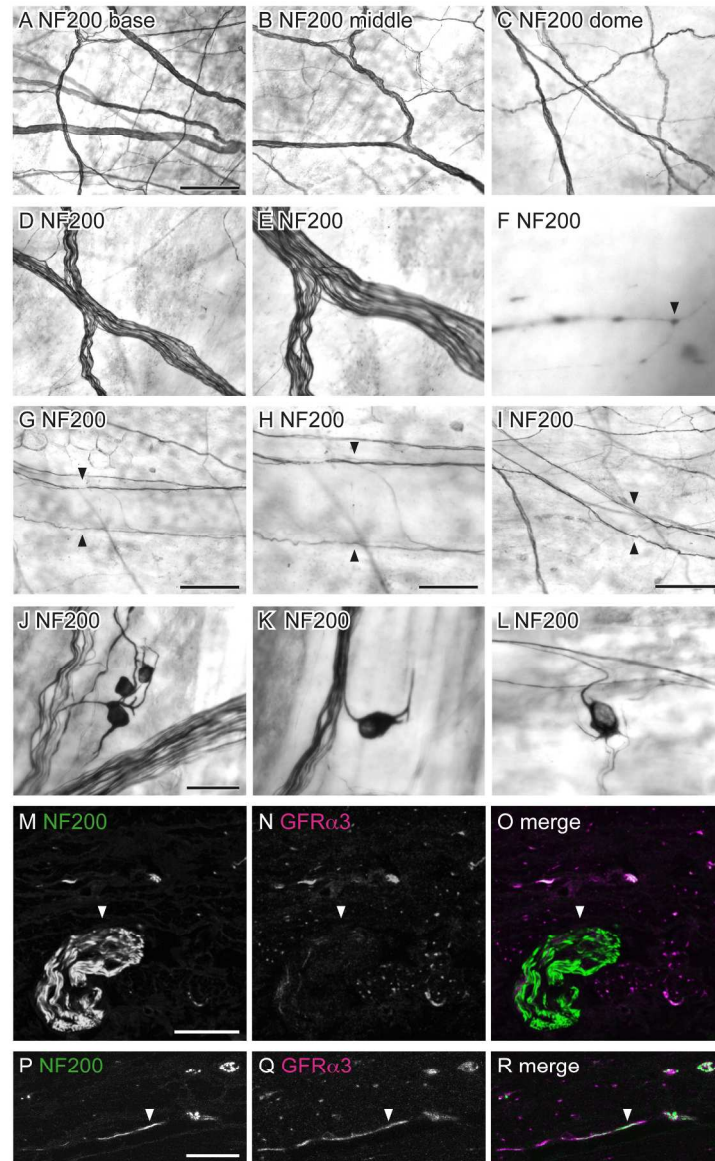

Supplementary figure 10

Supplementary Figure 10. Distribution of NF200-immunoreactive (IR) axons in the bladder. Panels A-L show DAB-processed whole mounts viewed with conventional microscopy whereas M-R are confocal micrographs of immunofluorescence in cryosections. A-C: Many NF200-IR axons were found in the detrusor and were distributed evenly throughout the bladder (a: base; b: middle; c: dome). D-E: The majority of NF200-IR axons travelled in large diameter axon bundles. F: NF200-IR terminals were occasionally observed in the detrusor (arrowhead). G-I: Few NF200-IR axons were associated with the vasculature; these were paravascular (arrowheads) and only observed on primary (G, H) and secondary (I) vascular branches. J-L: NF200-IR neurons were observed in the detrusor; many had short processes and were found individually (K, L) or in small clusters (J). M-O: Large diameter NF200-IR axon bundles (arrowheads) on the serosal surface were not immunoreactive for GFR $\alpha$ 3. P-R: Some NF200-IR axons in the detrusor were immunoreactive for GFR $\alpha$ 3 (arrowheads); it was difficult to determine if these comprised single or multiple axons. The serosal surface of the bladder is orientated to the bottom in panels m-r. Scale bar = 200  $\mu$ m in (A) also applies to (B, C); 100  $\mu$ m in (D) also applies to (E); 20  $\mu$ m in (F); 200  $\mu$ m in (G); 100  $\mu$ m in (G); 200  $\mu$ m in (I), 50

$\mu\text{m}$  in (J) also applies to (K, L); 20  $\mu\text{m}$  in (M) also applies to (N, O); 10  $\mu\text{m}$  in (P) also applies (Q, R).  
GFR $\alpha$ 3, glial cell line-derived neurotrophic factor family receptor  $\alpha$ 3; NF200, neurofilament, 200 kDa.  
168x274mm (300 x 300 DPI)

### Supplementary Figure Legends

**Supplementary Figure 3.** Co-expression of CGRP- and GFR $\alpha$ 3-immunoreactivity (IR) in the detrusor and suburothelial plexus. All panels except K-M (cryosection) are from whole mount preparations. **A-C:** Confocal z-stack (34  $\mu$ m thick, 1  $\mu$ m step size) through the detrusor showed that many CGRP-IR axon bundles contained GFR $\alpha$ 3-IR axons, but some single axons labeled for CGRP-IR were GFR $\alpha$ 3-negative (arrowheads). **D-F:** Confocal image in the detrusor illustrating partial co-expression (arrowheads) between CGRP- and GFR $\alpha$ 3-IR in axons. **G-J:** Confocal image in the detrusor showing two small, elongated GFR $\alpha$ 3-IR cells (arrowheads) with their processes. These appeared to be innervated by CGRP axons. DAPI (blue) labels nuclei of GFR $\alpha$ 3-IR cells and surrounding muscle cells. **K-M:** Confocal z-stack (15  $\mu$ m thick, 0.5  $\mu$ m step size) of a cryosection showing the majority of GFR $\alpha$ 3-IR axons in the suburothelial plexus were immunoreactive for CGRP but relatively few CGRP-IR axons were immunoreactive for GFR $\alpha$ 3. **N-P:** Confocal images in the suburothelial plexus of a whole mount demonstrating that most GFR $\alpha$ 3-IR terminals were immunoreactive for CGRP, but some CGRP-IR terminals were not immunoreactive for GFR $\alpha$ 3. In K-P, arrows indicate single-labeled CGRP-IR axons (K-M) and terminals (N-P), whereas arrowheads indicate a double-labeled GFR $\alpha$ 3- and CGRP-IR axon (k-m), and terminal (n-p). Scale bar = 100  $\mu$ m in (A) also applies to (B, C); 30  $\mu$ m in (D) also applies to (E, F); 20  $\mu$ m in (G) also applies to (H-J). Scale bar = 100  $\mu$ m in (K) also applies to (L-M); 30  $\mu$ m in (N) also applies to (O, P). CGRP, calcitonin gene-related peptide; GFR $\alpha$ 3, glial cell line-derived neurotrophic factor family receptor  $\alpha$ 3.

**Supplementary Figure 5.** CGRP- and GFR $\alpha$ 3-immunoreactive (IR) axons associated with the bladder vasculature as viewed in whole mounts. Panels **A-F** show diaminobenzidine (DAB)-processed tissue viewed with conventional microscopy whereas **G-O** are confocal micrographs of immunofluorescence. Numbered arrowheads indicate primary, secondary and tertiary branches of the vascular tree. **A-C:** Many CGRP-IR para-vascular axons were found on the primary, secondary (A, B) and tertiary (C) branches of the vascular tree; peri-vascular axons were also found on the primary branch but were sparse on subsequent branches. **D-F:** Para- and peri-vascular GFR $\alpha$ 3-IR axons were associated with all branches of the vascular tree. **G-I:** Many para-vascular CGRP- and GFR $\alpha$ 3-IR axons were associated with the primary and secondary branches of the vascular tree; GFR $\alpha$ 3-IR peri-vascular axons were more

prevalent than CGRP-IR peri-vascular axons on these branches. **J-I:** CGRP- and GFR $\alpha$ 3-IR para-vascular axons were associated with secondary and tertiary vessel branches; many GFR $\alpha$ 3-IR peri-vascular axons were present in these branches. **m-o:** Neither CGRP- nor GFR $\alpha$ 3-IR para-vascular axons extended to the most distal aspects of the vascular tree. Images (G-O) are confocal z-stacks (thickness: G-I, 45  $\mu$ m; J-L, 28  $\mu$ m; M-O, 30  $\mu$ m; all with 1  $\mu$ m step size). Scale bar = 200  $\mu$ m in (A) also applies to (D); 100  $\mu$ m in (B) also applies to (C, E, F); 100  $\mu$ m in (g) also applies to (H, I); 100  $\mu$ m (J) also applies (K, L); 100  $\mu$ m in (M) also applies to (N, O). CGRP, calcitonin gene-related peptide; GFR $\alpha$ 3, glial cell line-derived neurotrophic factor family receptor  $\alpha$ 3.

**Supplementary Figure 6.** Comparison of different axon populations supplying blood vessels in bladder whole mounts. Panels **A-C** show diaminobenzidine (DAB)-processed tissue viewed with conventional microscopy whereas **D-O** are confocal micrographs of immunofluorescence. Numbered arrowheads indicate primary, secondary and tertiary branches of the vascular tree. **A-C:** TH-immunoreactive (IR) axons densely innervated all branches of the vascular tree that traversed the bladder (A: base; B: middle; C: dome). **D-F:** Many TH-IR axons and relatively few CGRP-IR axons were associated with distal portions of primary vessel branches. **G-I:** Higher magnification of the primary to secondary branch point in d-f that demonstrates relatively few CGRP-IR peri-vascular axons. **J-L:** Numerous TH- and GFR $\alpha$ 3-IR para- and peri-vascular axons densely innervated the primary and secondary branches of the vascular tree. **M-O:** Many TH-IR para- and peri-vascular axons were immunoreactive for GFR $\alpha$ 3. Panels (D-O) are confocal z-stacks (thickness: D-F, 50  $\mu$ m; g-l, 30-32  $\mu$ m; all with 1  $\mu$ m step size). Scale bar = 500  $\mu$ m in (A) also applies to (B, C); 200  $\mu$ m in (D) also applies to (E, F); 50  $\mu$ m in (G) also applies to (H-L); 40  $\mu$ m in (M) also applies to (N-O). CGRP, calcitonin gene-related peptide; GFR $\alpha$ 3, glial cell line-derived neurotrophic factor family receptor  $\alpha$ 3; TH, tyrosine hydroxylase.

**Supplementary Figure 7.** Non-vascular noradrenergic innervation of the detrusor, as viewed in whole mount preparations. Panels **A-F** show diaminobenzidine (DAB)-processed tissue viewed with conventional microscopy whereas **G-L** are confocal micrographs of immunofluorescence. **A-C:** TH-immunoreactive (IR) axon bundles of varying thickness and axons associated with a blood vessel (arrowhead, A). **D-F:** Three types of TH-IR axon

terminals (arrowheads) were found in the detrusor: non-specialised simple endings (D), specialised multi-branched endings (E), and those that branched off the vascular tree, originating from para-vascular axons (F). Arrows indicate a branch point from a single specialised TH-IR axon (E) and TH-IR para-vascular axons on a distal portion of the vascular tree (F). **G-I:** TH- and GFR $\alpha$ 3-IR were rarely co-expressed in axons in the detrusor. **J-L:** Few TH-IR axons travelled within the large diameter bundles of GFR $\alpha$ 3-IR axons; these TH-IR axons did not co-express GFR $\alpha$ 3-IR. Images (G-O) are confocal z-stacks (thickness: G-I, 10  $\mu$ m; J-L, 20  $\mu$ m; all with 1  $\mu$ m step size). Scale bar = 100  $\mu$ m in (A) also applies to (B, C); 100  $\mu$ m in (D) also applies to (E, F); 10  $\mu$ m in (G) also applies to (G, I); 50  $\mu$ m in (J) also applies to (J, K, L). GFR $\alpha$ 3, glial cell line-derived neurotrophic factor family receptor  $\alpha$ 3; TH, tyrosine hydroxylase.

**Supplementary Figure 9.** Comparison of glial markers (GFAP- and S100-) with GFR $\alpha$ 3-immunoreactive (IR) distribution in the bladder. Panels show confocal images of immunofluorescence in bladder sections (A-C, P-S) and wholemount preparations (D-O, T-W). DAPI labelling of nuclei was performed to indicate general cellular distribution within each tissue and to show that none of the other markers were found within the nucleus. **A-C:** Comparison of GFAP- and GFR $\alpha$ 3-IR distribution in the bladder at low magnification. **D-G:** Many, but not all GFAP-IR cells in the detrusor were immunoreactive for GFR $\alpha$ 3. **H-K:** Example of a double labelled GFAP- and GFR $\alpha$ 3-IR glial cell in the detrusor. **L-O:** The majority of GFR $\alpha$ 3-IR cells with elongated processes were not immunoreactive for GFAP. **P-S:** Many GFR $\alpha$ 3-IR cells associated with the vasculature were immunoreactive for GFAP. **T-W:** Many S100-IR cells in the detrusor were immunoreactive for GFR $\alpha$ 3. Arrowheads indicate single-labeled GFAP-IR cell (D-G), single-labeled GFR $\alpha$ 3-IR cell (L-O), and double-labeled cells (H-K, P-S, T-W). The lumen of the blood vessel in panels P-S is indicated (V). Scale bar = 200  $\mu$ m in (A) also applies (B, C); 20  $\mu$ m in (D, H, L, T) also applies to (E-G, I-K, M-O, U-W); 10  $\mu$ m in (P) also applies to (Q-S). GFAP, glial fibrillary acidic protein; GFR $\alpha$ 3, glial cell line-derived neurotrophic factor family receptor  $\alpha$ 3.

**Supplementary Figure 10.** Distribution of NF200-immunoreactive (IR) axons in the bladder. Panels **A-L** show DAB-processed whole mounts viewed with conventional microscopy whereas **M-R** are confocal micrographs of immunofluorescence in cryosections. **A-C:** Many

NF200-IR axons were found in the detrusor and were distributed evenly throughout the bladder (a: base; b: middle; c: dome). **D-E:** The majority of NF200-IR axons travelled in large diameter axon bundles. **F:** NF200-IR terminals were occasionally observed in the detrusor (arrowhead). **G-I:** Few NF200-IR axons were associated with the vasculature; these were para-vascular (arrowheads) and only observed on primary (G, H) and secondary (I) vascular branches. **J-L:** NF200-IR neurons were observed in the detrusor; many had short processes and were found individually (K, L) or in small clusters (J). **M-O:** Large diameter NF200-IR axon bundles (arrowheads) on the serosal surface were not immunoreactive for GFR $\alpha$ 3. **P-R:** Some NF200-IR axons in the detrusor were immunoreactive for GFR $\alpha$ 3 (arrowheads); it was difficult to determine if these comprised single or multiple axons. The serosal surface of the bladder is orientated to the bottom in panels m-r. Scale bar = 200  $\mu$ m in (A) also applies to (B, C); 100  $\mu$ m in (D) also applies to (E); 20  $\mu$ m in (F); 200  $\mu$ m in (G); 100  $\mu$ m in (G); 200  $\mu$ m in (I), 50  $\mu$ m in (J) also applies to (K, L); 20  $\mu$ m in (M) also applies to (N, O); 10  $\mu$ m in (P) also applies (Q, R). GFR $\alpha$ 3, glial cell line-derived neurotrophic factor family receptor  $\alpha$ 3; NF200, neurofilament, 200 kDa.
